# Supplementary material for: Selective fluorescent sensing of LMOFs constructed from tri(4-pyridylphenyl)amine ligand
Source: Royal Society of Chemistry journal article supplement (doi:10.1039/d1ra00726b), 2021-01-01
Supplement: d1ra00726b1.pdf [file d1ra00726b1.pdf]

# **Selective fluorescent sensing of LMOFs constructed from tri(4-pyridylphenyl)amine ligand**

Jian-Ling Ni, Yu Liang, Juan-Juan Shao, Jun-Feng Li, Ze-Yu Zhou, Fang-Ming Wang,\* and Li-Zhuang Chen\*

*School of Environmental and Chemical Engineering, Jiangsu University of Science  
and Technology, Zhenjiang, Jiangsu 212003, China*

## **Supporting Information**

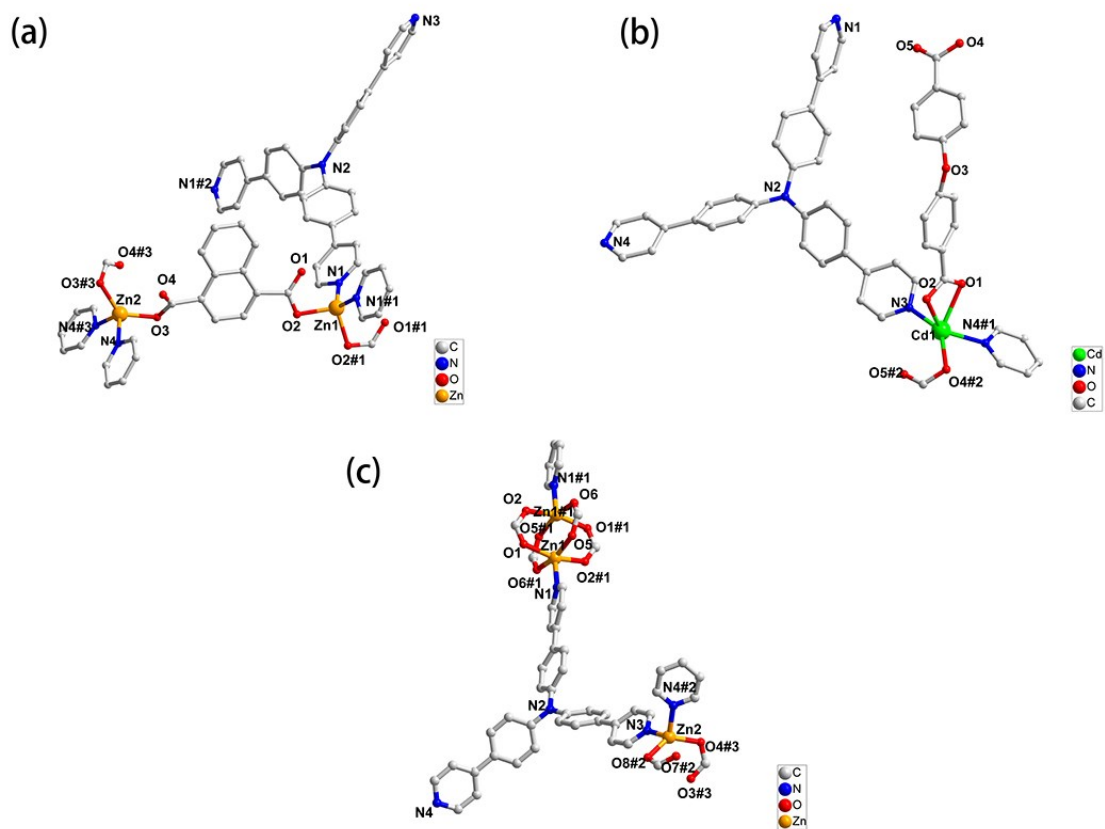

**Fig. S1.** (a) Coordination environment of the Zn<sup>2+</sup> atoms in **1**. Symmetry codes: #1 = 1 - x, y, -0.5 - z; #2 = - x, y, -1.5 - z; #3 = -x, y, 0.5 - z. (b) Coordination environment of the Cd<sup>2+</sup> atoms in **2**. Symmetry codes: #1 = 1 - x, 0.5 + y, 1.5 - z; #2 = - 1 + x, y, - 1 + z. (c) Coordination environment of the Zn<sup>2+</sup> atoms in **3**: #1 = 3 - x, 1 - y, - z; #2 = - x, 0.5 + y, 0.5 - z; #3 = -1 + x, y, 1 + z. The hydrogen atoms are omitted for clarity.

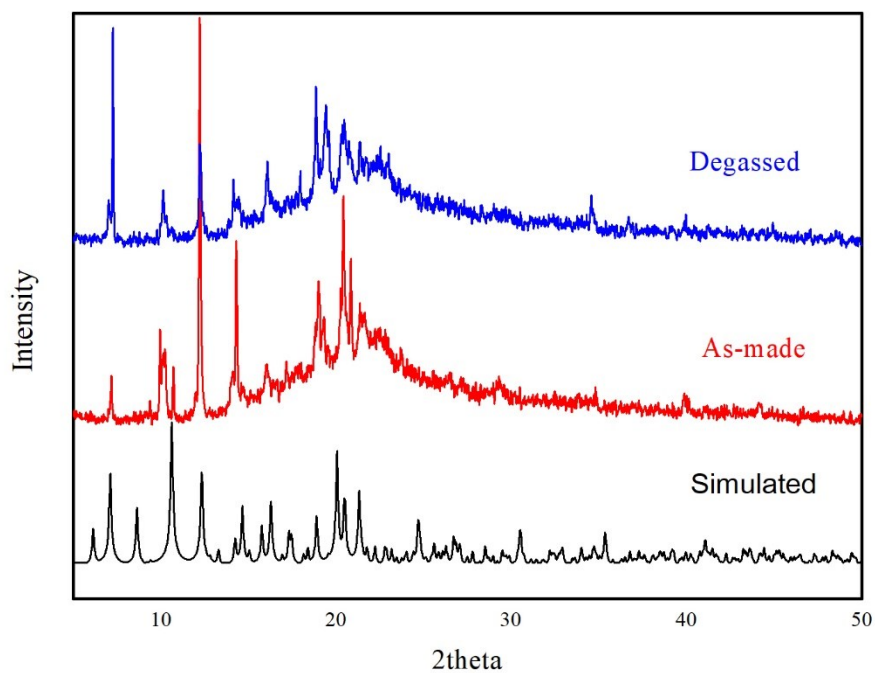

**Fig. S2.** PXRD patters. From bottom to top: simulated **1**, as made **1**, degassed **1**'.

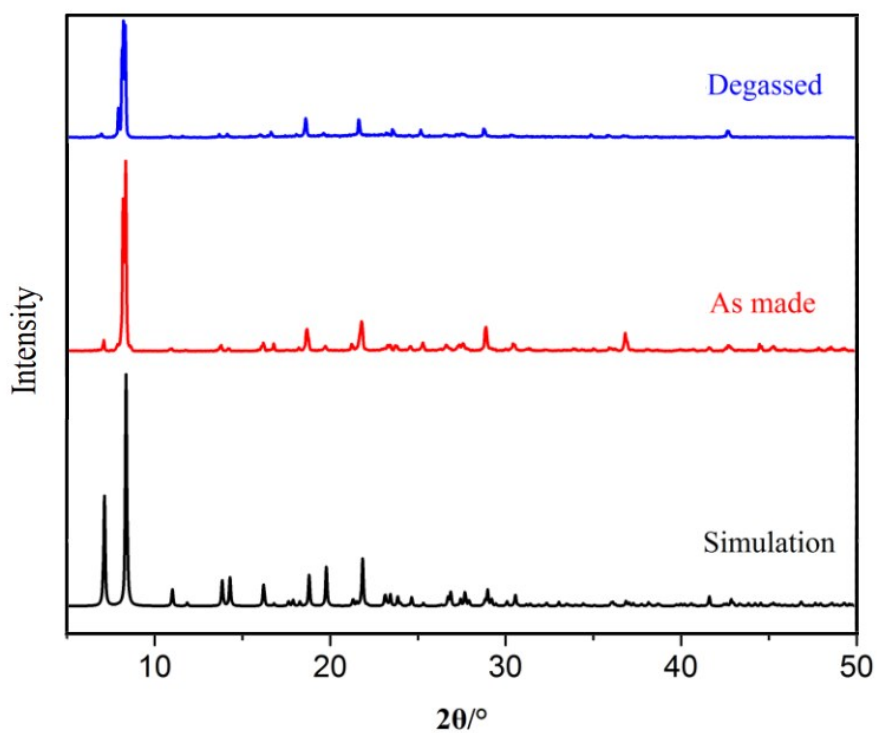

**Fig. S3.** PXRD patters. From bottom to top: simulated **2**, as made **2**, degassed **2**'.

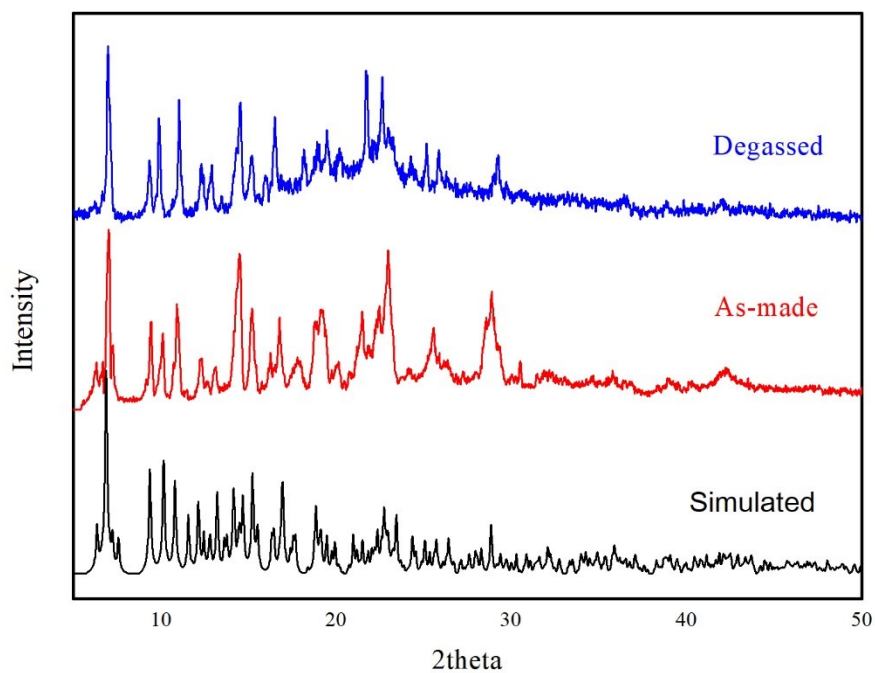

**Fig. S4.** PXR D patterns. From bottom to top: simulated **3**, as made **3**, degassed **3'**.

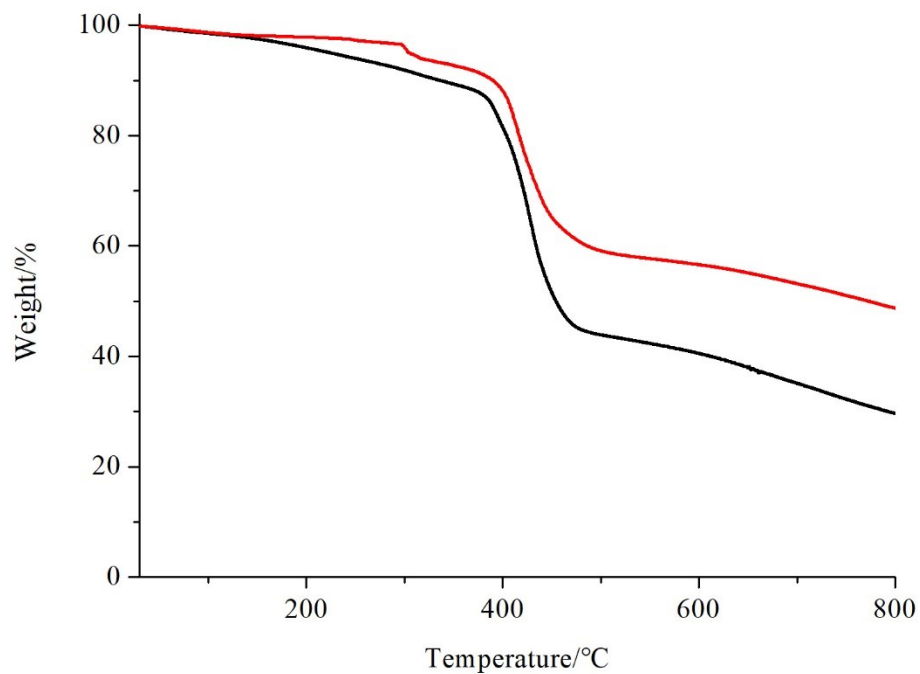

**Fig. S5.** TG profiles. From bottom to top: as made **1**, degassed **1'**.

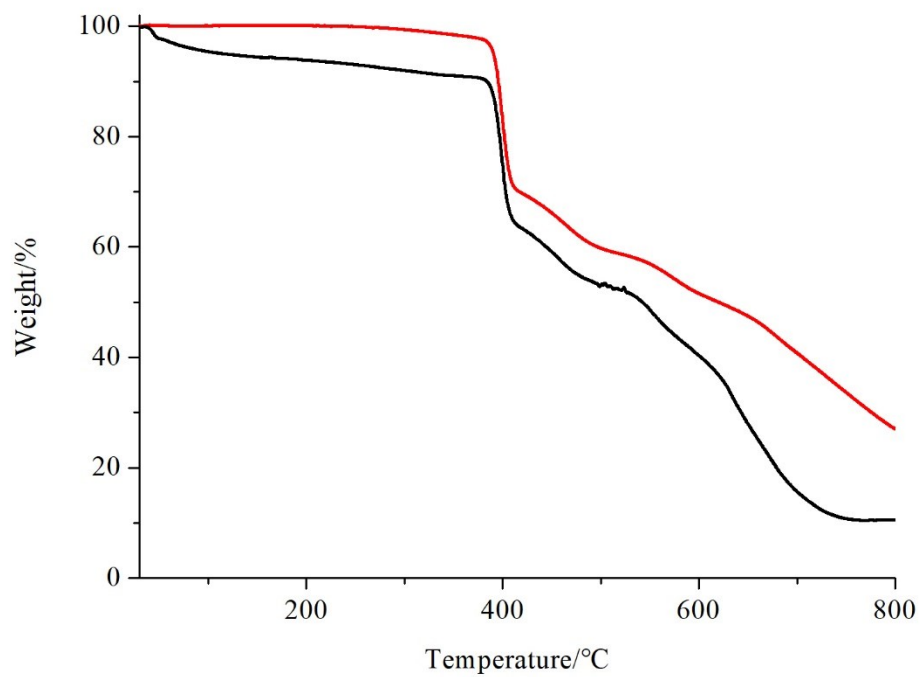

**Fig. S6.** TG profiles. From bottom to top: as made **2**, degassed **2'**.

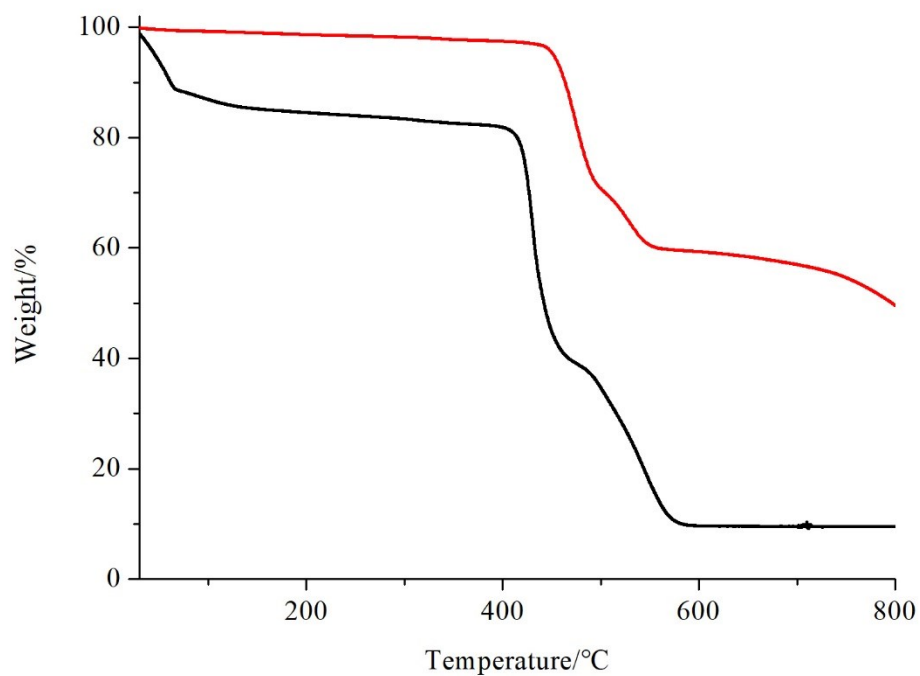

**Fig. S7.** TG profiles. From bottom to top: as made **3**, degassed **3'**.

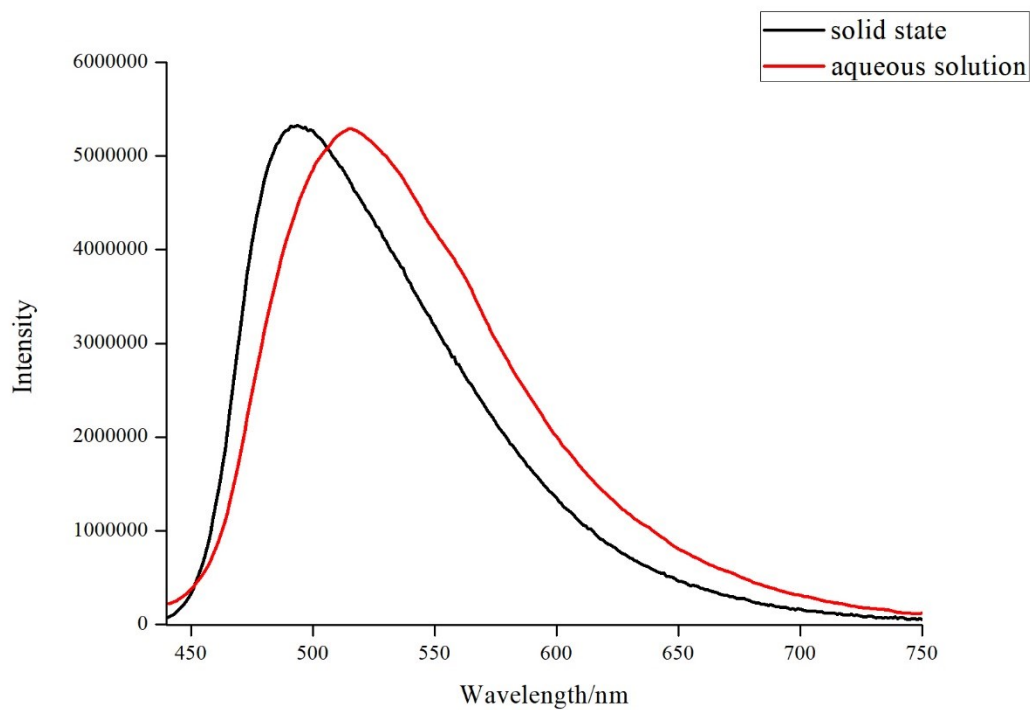

**Fig S8.** Emission spectra of compound **1** in solid state and aqueous solution.

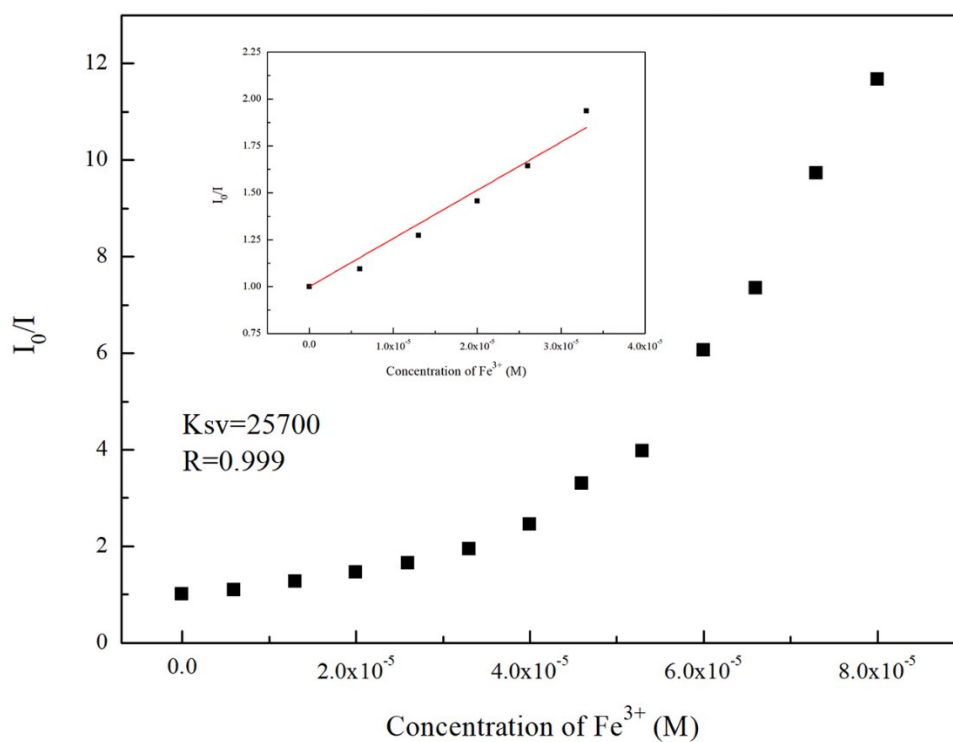

**Fig S9.** Stern-Volmer plot of compound **1** quenched by  $\text{Fe}^{3+}$  aqueous solution.

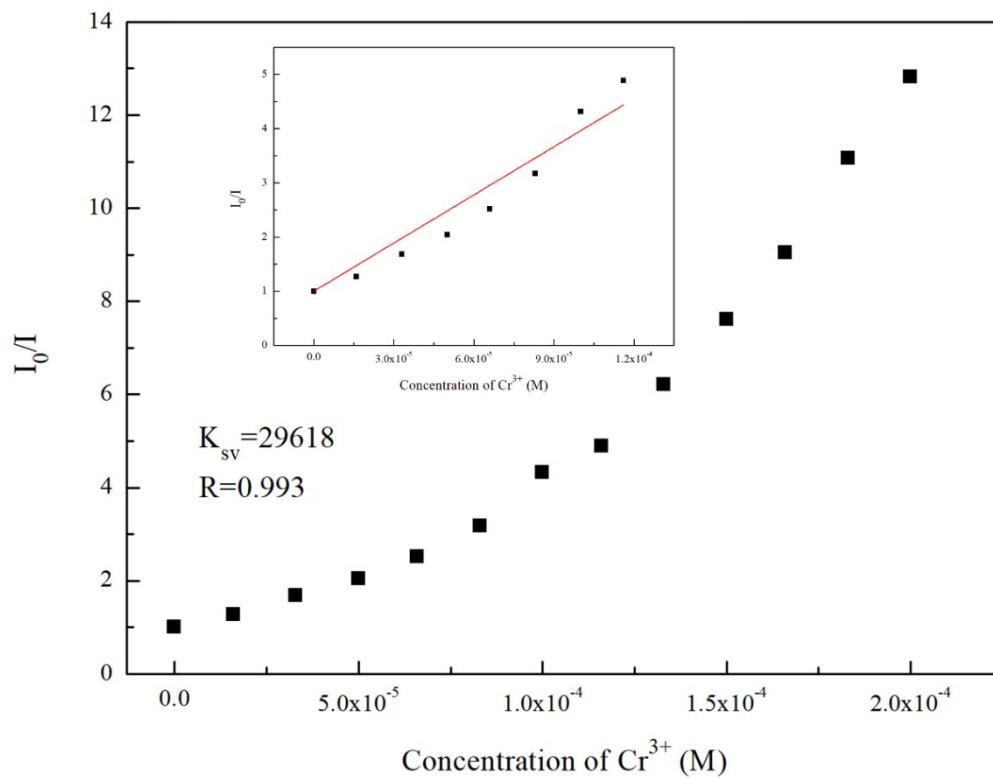

**Fig**

**S10.** Stern-Volmer plot of compound **1** quenched by  $\text{Cr}^{3+}$  aqueous solution.

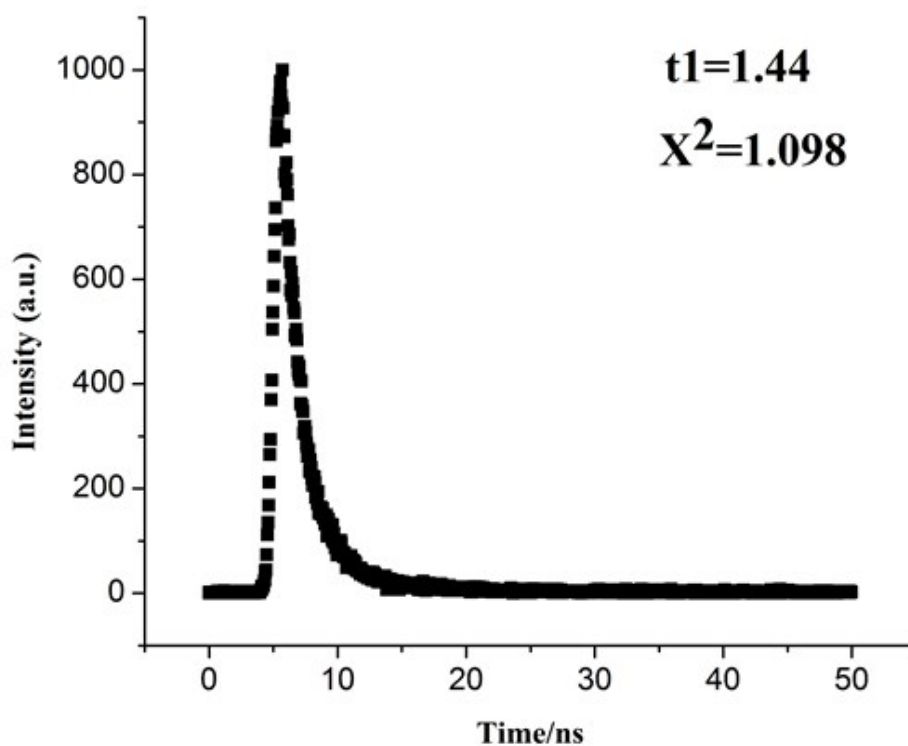

**Fig S11.** Fluorescence life time of compound **1**.

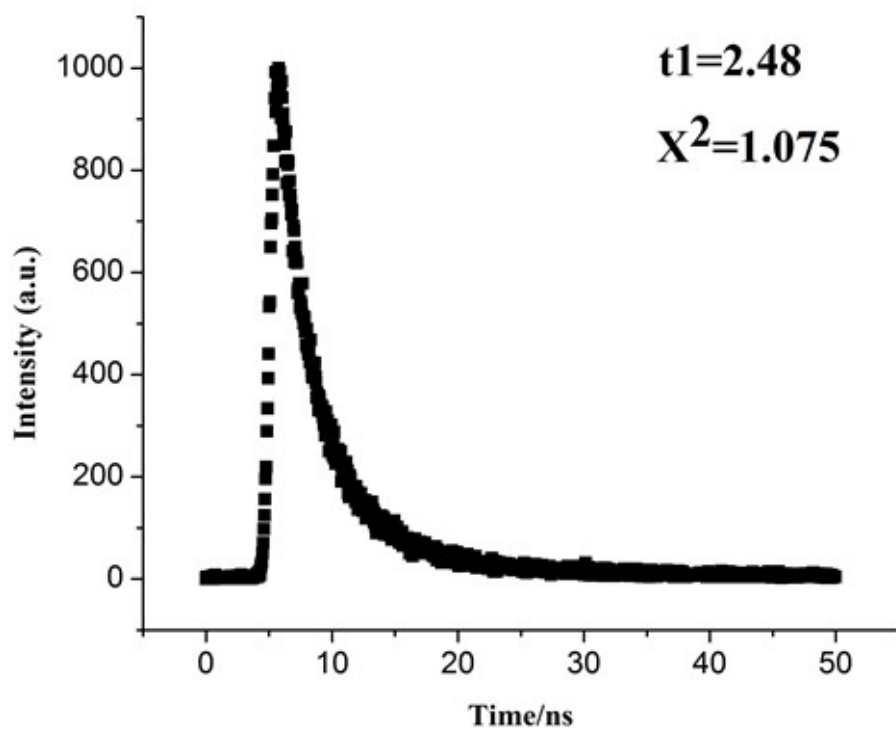

Fig S12. Fluorescence life time of compound 2.

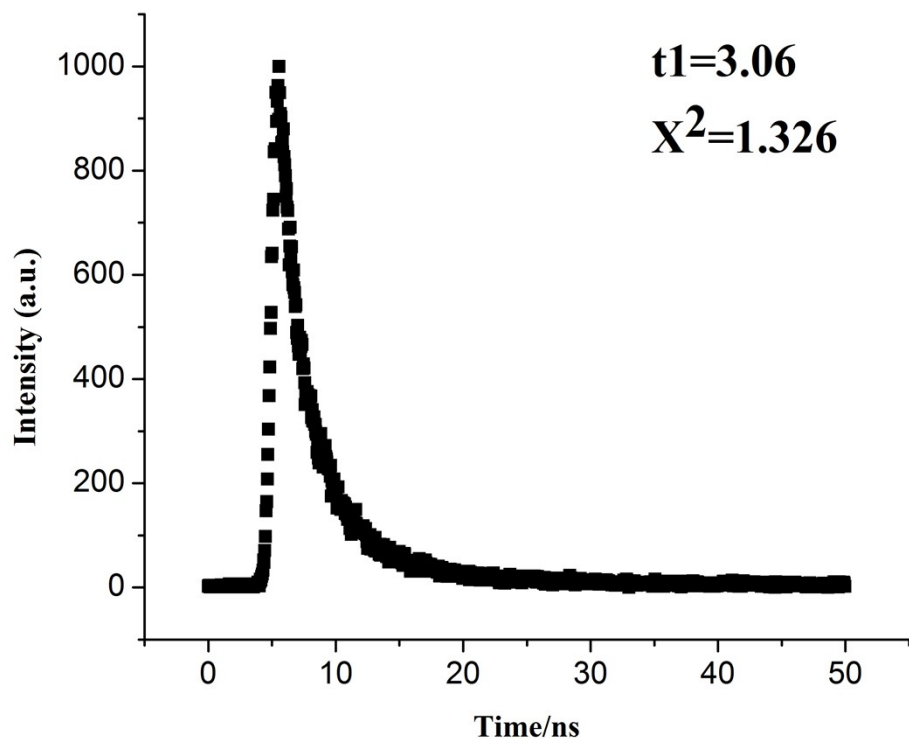

Fig S13. Fluorescence life time of compound 3.



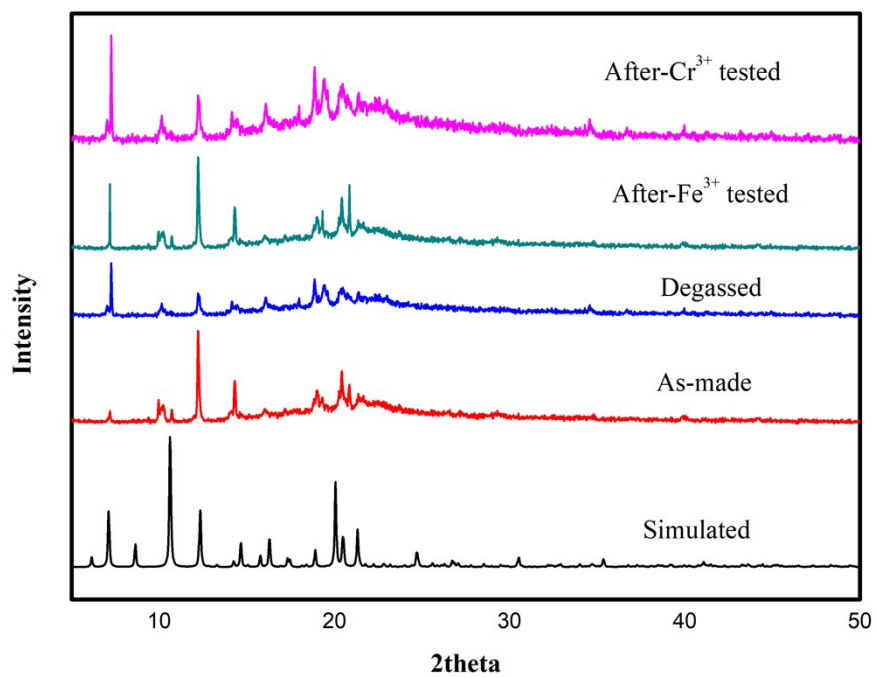

**Fig S14.** Powder X-ray diffraction patterns of compound **1** (as-made, simulated, Degassed and after five cycles for Fe<sup>3+</sup>/Cr<sup>3+</sup> test).

**Table S1.** Emission energies and CIE Coordinates with solvent exchange of **1-3**  
( $\lambda_{\text{ex}}=365\text{nm}$ )

| Compounds        | <b>1</b>                        |             | <b>2</b>                        |             | <b>3</b>                        |             |
|------------------|---------------------------------|-------------|---------------------------------|-------------|---------------------------------|-------------|
|                  | $\lambda_{\text{em}}/\text{nm}$ | CIE         | $\lambda_{\text{em}}/\text{nm}$ | CIE         | $\lambda_{\text{em}}/\text{nm}$ | CIE         |
| as made          | 492                             | (0.25,0.47) | 471,516                         | (0.25,0.39) | 506                             | (0.31,0.50) |
| aniline          | 507                             | (0.28,0.53) | 474                             | (0.19,0.33) | 513                             | (0.27,0.42) |
| nitrobenzene     | 509                             | (0.28,0.52) | 524                             | (0.29,0.42) | 532                             | (0.32,0.42) |
| benzene          | 513                             | (0.29,0.53) | 483                             | (0.22,0.37) | 521                             | (0.28,0.47) |
| isopropylbenzene | 513                             | (0.29,0.53) | 471                             | (0.21,0.35) | 527                             | (0.31,0.50) |
| 1,3,5-T-benzene  | 515                             | (0.30,0.54) | 491                             | (0.22,0.43) | 528                             | (0.32,0.52) |
| m-xylene         | 515                             | (0.30,0.54) | 475                             | (0.22,0.36) | 518                             | (0.28,0.49) |
| t-Bu-benzene     | 515                             | (0.29,0.54) | 473                             | (0.22,0.35) | 525                             | (0.30,0.47) |
| toluene          | 515                             | (0.29,0.53) | 474                             | (0.21,0.34) | 521                             | (0.29,0.49) |
| o-xylene         | 517                             | (0.30,0.53) | 475                             | (0.22,0.36) | 522                             | (0.30,0.50) |
| bromobenzene     | 518                             | (0.30,0.54) | 478                             | (0.23,0.38) | 512                             | (0.27,0.46) |
| p-xylene         | 519                             | (0.31,0.54) | 473                             | (0.22,0.35) | 523                             | (0.30,0.51) |
| chlorobenzene    | 520                             | (0.30,0.53) | 474                             | (0.22,0.36) | 525                             | (0.30,0.50) |
